# Supplementary material for: DNase I Induces Other Endonucleases in Kidney Tubular Epithelial Cells by Its DNA-Degrading Activity
Source: PubMed Central journal article supplement (PMC7698339; doi:10.3390/ijms21228665), 2020-11-17
Supplement: ijms-21-08665-s001.pdf [file ijms-21-08665-s001.pdf]

**SUPPLEMENT**  
**TABLES AND FIGURES**

**DNase I induces other endonucleases in kidney tubular  
epithelial cells by its DNA-degrading activity**

Tariq Fahmi <sup>1</sup>, Xiaoying Wang <sup>1</sup>, Dmitry D. Zhdanov <sup>1</sup>, Intisar Islam <sup>1</sup>,  
Eugene O. Apostolov <sup>1</sup>, Alena Savenka <sup>1</sup>, and Alexei G. Basnakian <sup>1,2</sup>

<sup>1</sup> *Department of Pharmacology & Toxicology, University of Arkansas for Medical Sciences, 4301 West Markham Street, #638, Little Rock, AR 72205*

<sup>2</sup> *Central Arkansas Veterans Healthcare System, 4300 West 7<sup>th</sup> Street, Little Rock, AR 72205*

TABLE S1. Primers used for PCR and real-time RT-PCR

| Primers for real time RT-PCR |                              |                              |                  |                     |
|------------------------------|------------------------------|------------------------------|------------------|---------------------|
| Target                       | Sense (5'-3')                | Antisense (5'-3')            | Product size, bp | Annealing temp., °C |
| DNase I                      | TGCTGTTGGGAAGCTACTGGATGA     | TCTCGGCTGAAGGTGTCATTCCA      | 198              | 65                  |
| DNase X                      | GCATACATAGCAATGCGTGGCCTT     | TCAGTGTCACTGTGTTGGCATTGA     | 109              | 64                  |
| DNase I like 2               | AGACCTAAGTGCAGTGCCTTGCT      | ATACTGGTCACGTCCAAGTGGCTT     | 100              | 65                  |
| DNase Y                      | TCGGCCAGCTTTATAAGTCAGCGA     | TGGGTACAGGGACATCTTTGCACT     | 85               | 65                  |
| DNase 2 $\alpha$             | AGTTTCCAGGGATTGGCAAGCAAC     | ATTTGGCAAAGCTCTGGAAGGTGG     | 195              | 64                  |
| DNase 2 $\beta$              | AAGTGGCCTCTGCATCACTCTCAA     | TGTGGATGAGTCCCAGCGAAAGA      | 125              | 65                  |
| L-DNase 2                    | TGCCCGAAGACATTGAGGATGAGT     | CACGTTTGGTCCATTACGCGAGTT     | 90               | 64                  |
| CAD                          | AGGACCCATCCTGTTTGAAGGTT      | TGTA CTGCACGGACTTGAGCTTGT    | 198              | 64                  |
| EndoG                        | GCATGCCTGGAACAACCTTGAGAA     | TGCCTCCAGGATCAACACCTTGAA     | 193              | 64                  |
| 18s                          | GGATCCATTGGAGGGCAAGT         | ACGAGCTTTTAACTGCAGCAA        | 91               | 64                  |
| EndoG (mouse)                | GAATGCCTGGAACAACCTTGAGAG     | TGCTCCAGGATCAGCACCTTGAA      | 193              | 63                  |
| $\beta$ -actin               | TGAGAGGGAAATCGTGCGTGACAT     | ACCGCTCATTGCCGATAGTGATGA     | 152              | 65                  |
| Primers for PCR              |                              |                              |                  |                     |
| Target                       | Sense (5'-3')                | Antisense (5'-3')            | Product size, bp | Annealing temp., °C |
| DNase X                      | TTGGCTGAGGCAAGCGTCGG         | GCCAGTCTCATCAGGCCG           | 2949             | 59                  |
| DNase I like 2               | GCTTTTGCCCTGATCCTCAGTTAATGG  | TGAACATTAAGATCAAGCTCTGCAGCC  | 2473             | 59                  |
| DNase Y                      | AAAGTGGCCAGAGGGATCCAGTAATT   | CCTGGGACTATGCCCTTTTGAGAATCCA | 2903             | 60                  |
| DNase 2 $\alpha$             | AGACCCAGGTCCCTGAAGTCTTTAG    | TTCCCCTTGAGACAGTGTCTGTGTTG   | 2586             | 56.5                |
| DNase 2 $\beta$              | GCATCAGATGACATGAGACTCAGCCTC  | TCTTCAGCAACACCCTCAGCTATTTT   | 2997             | 58                  |
| L-DNase 2                    | CAGCTAAGCAAGAGGTAAGGTCCT     | TTCTGGGATCCAAACTCAGCTTCTC    | 3064             | 57.5                |
| CAD                          | TGGGCTTGAATGGGCGCTGG         | TAGACGTGTACCGCCGCCA          | 2510             | 59                  |
| EndoG                        | TACGGGCCGTTTGACCCTGG         | TGGGAACATGTATGGTGGGGACC      | 3039             | 56                  |
| GAPDH                        | CTCTCTGCTCCTCCCTGTTCTAGAGACA | ATGGCATGGACTGTGGTCTAGAAAGCAT | 3008             | 61                  |
| Rpl13a                       | AAGATGGCGGAGGGGCAGGTTT       | AGAGTCCATTGGTCTTGAGGACCTCTG  | 2646             | 58                  |
| Rplp0                        | CCCCTTTTCGGAAGTAGCTCACTCAC   | CAAATTAAGCAGGCTGACTTGGTGTGAG | 2741             | 58                  |

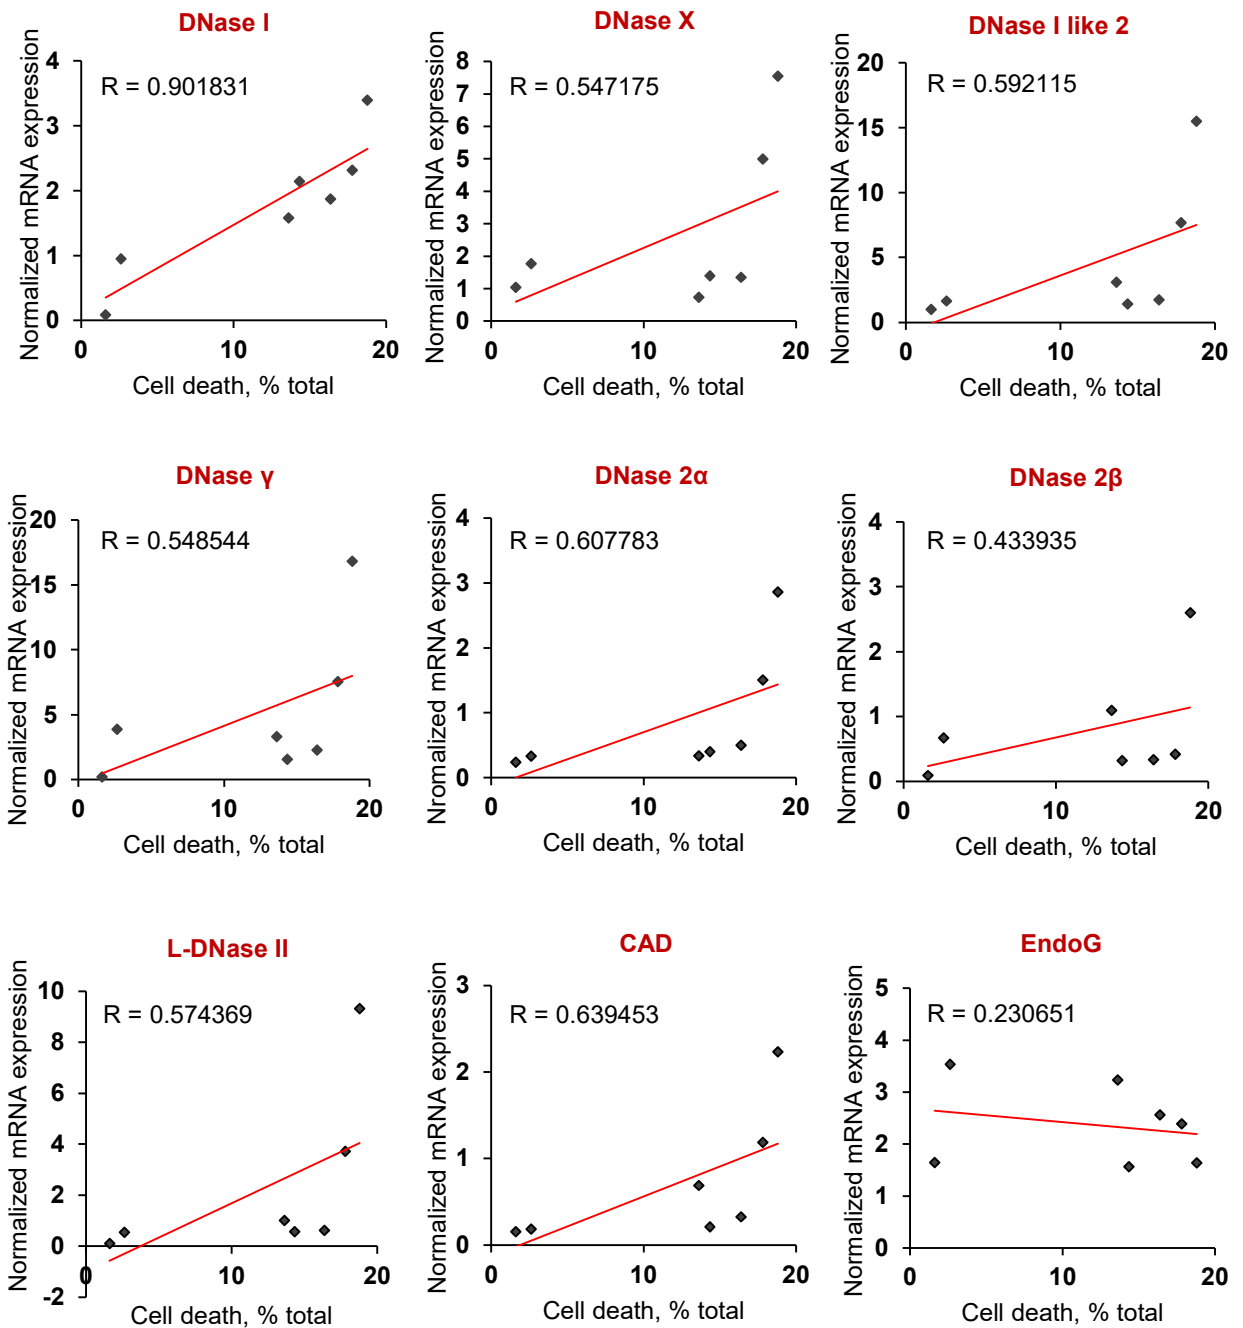

**Supplement Figure S1.** Correlation of endonucleases' expression with cell death. Correlation between mRNA expression of each endonuclease measured by real time RT-PCR and cell death measured by PI assay at varying time points. All endonuclease except EndoG show positive correlation.
